# Supplementary material for: Ground-penetrating radar reveals ice thickness and undisturbed englacial layers at Kilimanjaro's Northern Ice Field
Source: Copernicus journal article supplement (doi:10.5194/tc-2016-154), 2016-07-05
Supplement: Supplementary file [file tc-2016-154-AC1-supplement.pdf]

1 **"Ground-penetrating radar reveals ice thickness and undisturbed englacial**  
2 **layers at Kilimanjaro's Northern Ice Field" by Pascal Bohleber et al.**

3 - Response to reviews and revised manuscript -  
4

5 **General Remarks:** *All line numbers in "Changes to manuscript" refer to the revised*  
6 *version. Changes in the corresponding pdf of the revised manuscript are highlighted in*  
7 *red.*

8 *Author's responses to the referee's comments are in blue.*

9 *All new references used in this text here can be found in the revised manuscript.*  
10  
11

12 **Response to referee #1 (Denis Samyn) posted on Sept. 12th 2016**

13 Bohleber et al. surveyed the Northern Ice Field of Kilimanjaro for reconstructing its  
14 bedrock topography, ice thickness and internal stratigraphy, using ground-  
15 penetrating radar (GPR) at various frequencies. Despite GPR being widely used in  
16 glaciology nowadays, this work is the first of its kind on Kilimanjaro, and therefore  
17 represents a novel approach in the exploration and investigation history of this  
18 mythical mountain. This study is well written, and I believe that the conclusions are  
19 scientifically sound and will contribute significantly to the future investigations of  
20 local, and other tropical, glacier recession dynamics.  
21

22 As a general advice for improving this manuscript, I would suggest the  
23 authors to strengthen their point where it is not stated carefully, or where the  
24 implications or interest for the scientific community are overlooked. These  
25 comments do not diminish the quality of this work though; therefore I recommend  
26 publishing this paper with minor revisions as described below.  
27

28 *We thank the referee for a very thorough review, we appreciate the helpful*  
29 *suggestions and comments.*  
30  
31

32 **Referee comment**

33 - Page 1, Line 7: “indicating an undisturbed internal stratigraphy within NIF’s  
34 central flat area”.

35

36 Whereas other statements of minor importance have been stressed more cautiously,  
37 I believe that this statement is too assertive and should be rephrased more carefully.  
38 Clearly some unknown uncertainty remains in this regard and, without drilling a  
39 new ice core between the former drilling sites and the edge ice cliff, without the  
40 result of the ice cliff dating work mentioned in the paper, and without carrying ice  
41 flow modelling investigations, no clear or solid information is available to certify  
42 that the internal stratigraphy is undisturbed. The influences on ice flow dynamics  
43 through time and space of, first, near-surface and internal meltwater and, second,  
44 fumaroles, still need to be better documented in order to fully appraise potential  
45 issues on the ice stratigraphical integrity. This comment also stands for the  
46 sentences on Page 9, Line 6 “We thus conclude that the internal stratigraphy within  
47 the NIF central flat area is generally undisturbed”, and on Page 9, Line 32 “[...]”  
48 revealed an undisturbed internal stratigraphy”.

49

50 We believe the presence of spatially continuous internal reflection horizons in the  
51 GPR profiles stem from an uninterrupted, spatially coherent layering within the NIF  
52 plateau area, which is one of the central findings of our study. Limitations to this  
53 finding apply to the near-surface sections where noise associated with meltwater  
54 hampers tracing reflections, as well as to the near-basal sections where strong  
55 continuous reflections are not detected. Our main point is that the coherent  
56 stratigraphy in the 200 MHz profiles does not provide any evidence for deformed  
57 (overturned, interrupted) layers. Based on the referee's comment we understand  
58 that the general use of the term "undisturbed stratigraphy" can be misinterpreted.  
59 Hence we decided to replace the term "undisturbed stratigraphy" with  
60 "uninterrupted, spatially coherent internal layering ". We also clarified on the depth  
61 restriction of the tracing of IRH in the abstract.

62 We agree with the referee that additional information regarding the influence of  
63 meltwater percolation (especially on the cm-scale chemical stratigraphy in ice  
64 cores), as well as investigating basal fumarole activity would be helpful for an even  
65 more refined assessment of the stratigraphy at NIF and regard this a helpful  
66 suggestion for future research.

67

68 **Changes to manuscript:**

- 69 • Page 1, Line 7: "indicating an uninterrupted, spatially coherent internal  
70 layering "
- 71 • Page 1, Line 8: "We show that, at least for the upper 30 m, it is possible to  
72 follow isochrone layers between two former NIF ice core drilling sites and a  
73 sampling site on NIF's vertical wall."
- 74 • Page 9, Line 16-17: "generally composed of uninterrupted, spatially coherent  
75 layers"
- 76 • Page 10, Line 19-20: "an internal stratigraphy made up of an uninterrupted,  
77 spatially coherent layering.

78

79 **Referee comment**

80 - Pages 4-5, "2.3 Uncertainty considerations" section

81

82 Here the vertical error in internal reflection horizons (IRH) tracking is discussed.  
83 How about the horizontal uncertainty related to the various GPR pulse triggering  
84 methods used (wheel, time, manual)? In other words, what is the horizontal extent  
85 of potential bedrock/stratigraphical discontinuities that the method used might  
86 omit while progressing on the glacier surface? This is of potential significance in  
87 regions of increased meltwater/fumarole activity, where electromagnetic coherency  
88 is more prone to disturbance.

89

90 We thank the referee for this suggestion and have now added a short discussion of  
91 the horizontal resolution in section 2.3 "uncertainty considerations". In essence we

92 are following earlier studies by Welch et al. (1998) and Yilmaz (1987), who showed  
93 that for properly migrated radargrams the horizontal resolution becomes  $\lambda/2$ ,  
94 independent of reflector depth. In data acquisition we took care to avoid spatial  
95 aliasing by collecting traces less than one quarter wavelength apart.

96

97 **Changes to manuscript:**

- 98 • Page 5, Line 6 ff.: " Shot distances in data acquisition... "

99

100

101 **Referee comment**

102 - Page 5, Lines 12-14: "Assuming 0.3 m uncertainty in the length of the rope at 16 m  
103 (mainly resulting from knots tied into the rope)".

104

105 From personal experience, the error stated seems rather low. In addition to the tied  
106 knots mentioned by the authors, the type of rope, its elasticity, and the mass of the  
107 dead weight at its end will certainly contribute. The uncertainty given here is  
108 therefore clearly a lower estimate.

109

110 We agree with the referee and have added text to clarify that we are regarding this  
111 uncertainty as merely a lower estimate.

112

113 **Changes to manuscript:**

- 114 • Page 5, Lines 17: "To derive a lower estimate of uncertainty..."

115

116 **Referee comment**

117 - Page 7, Lines 21-22: "The low ice thickness is likely a result of the surface  
118 gradually sloping off towards the west outside the caldera. A distinct rise in the  
119 local GPR bedrock reflection appears where the location of the crater rim below the  
120 ice is suggested by satellite images (Figure 6, and small insert therein)".

121

122 The size of Fig. 6 inset is way too small to be able to observe this. This inset could  
123 certainly be resized to the dimensions of the main figure. In fact, it should, given the  
124 importance of the authors' point here.

125

126 We took care to resize the insert in order to aid better visual recognition of the  
127 satellite image. As a general remark, we have also tried to improve the readability of  
128 all of the figures by increasing font size etc.

129

130 **Changes to manuscript:**

- 131 • Figure 6: Resized insert to full size

132

133 **Referee comment**

134 - Page 7, Lines 23-24: "This finding implies that the local bedrock relief features  
135 may have affected past ice build up and decay through limiting exposure to solar  
136 radiation and wind".

137

138 I find this argument somewhat weak here – one would either need to check this  
139 limiting exposure effect with e.g. an insulation model, or provide more (visual?)  
140 details.

141

142 We did not intend to make this argument based on our findings alone. Instead, we  
143 wanted to point out the detection of the subglacial crater rim in context of the  
144 previous study of Kaser et al. (2010) who suggested that local bedrock relief  
145 features may have affected past ice build up and decay through limiting exposure to  
146 solar radiation and wind. We have changed the sentence to clarify accordingly.

147

148 **Changes to manuscript:**

- 149 • Page 7, Lines 34 ff.: "This finding supports the idea that local bedrock relief  
150 features may have affected past ice build up and decay through limiting  
151 exposure to solar radiation and wind (Kaser et al., 2010)."

152

153

154 **Referee comment**

155 - Page 7, Lines 28-35: “Considering additionally the coarse resolution used in  
156 the kriging approach, we regard the values derived from this method with caution  
157 only.

158 The estimates of total ice volume obtained from the Grid approach and DEM-only  
159 are  $(12.0 \pm 0.3)$  and  $(14.3 \pm 1.3) 10^6 \text{ m}^3$ , respectively. Evidently the main contribution  
160 to the difference in ice volume comes from different mean ice thickness values  
161 (using the 2012 surface area the mean ice thickness obtained from the Grid method  
162 gives a volume of  $(12.3 \pm 0.3) 10^6 \text{ m}^3$ ). The decrease in mean ice thickness  
163 suggested by the comparison of the two interpolation methods is not supported by  
164 surface height change measurements 2012–2015. Since both interpolation methods  
165 use the same surface topography supplied by the DEM as input, the difference in  
166 mean ice thickness has to come from differences in determining subglacial bedrock.  
167 Consequently, the difference in ice volume estimates is not used to infer a rate of ice  
168 loss.”

169

170 I wonder what is the added value of discussing the ‘Kriging’ method here, given its  
171 obvious flaws at such a low sampling resolution. There are various other  
172 interpolation techniques worth trying I think, that are not involving such a coarse  
173 resolution data grid.

174

175 Our intention was to include the 'Kriging' method as an alternative spatial  
176 interpolation routine that uses the GPR based derived ice thickness profiles only.  
177 The coarse spatial resolution is an immediate consequence of the sparse spatial  
178 coverage of the GPR profiles over the NIF. In this respect, a finer mesh-type array of  
179 profiles would have been desirable but was not feasible due to time and issues  
180 related to surface roughness. We agree that the results of the 'Kriging' routine  
181 provide less detail in comparison with the DEM-based and 'Grid' interpolation  
182 scheme. We are already stating in the manuscript that the 'Kriging' results are

183 regarded with caution only. In the end we decided to leave the 'Kriging' results in  
184 the text in order to illustrate to the reader the benefit of the GPR-DEM combined  
185 interpolation approach. We have changed the text to make this intention more clear.  
186 While a detailed analysis of the result of various interpolation models and  
187 techniques is far beyond the scope of this paper, the IACS working group on ice  
188 thickness has just submitted a paper on this topic with a large sample of glaciers of  
189 various types ("ITMIX experiment"). This promises much greater insight as  
190 compared to investigating one glacier only. As the data of our study will be  
191 submitted to GlaThiDA 3.0, the data will also be available for validation of a  
192 potential second ITMIX experiment.

193

194 **Changes to manuscript:**

- 195 • Page 6, Lines 19-21: "Although clearly suffering from these restrictions..."

196

197

198 **Referee comment**

199 - Page 7, Lines 31-33: "Evidently the main contribution to the difference in ice  
200 volume comes from different mean ice thickness values (using the 2012 surface area  
201 the mean ice thickness obtained from the Grid method gives a volume of (12.3  
202  $\pm 0.3$ )  $10^6$  m<sup>3</sup>)."   
203

203

204 There should also be another source of error introduced in the volume calculations  
205 through the fact that ice cover area is simply multiplied by ice depth here, which is  
206 valid for a rectangular prism. The numbers given are thus upper estimates of the  
207 glacier volume.

208

209 We agree that using the mean ice thickness multiplied by the total surface area can  
210 only give an estimate. Calculating the volume by multiplying area by height luckily  
211 works for every prism (and not just rectangular ones). Using the areal mean height  
212 (including its uncertainty) should avoid a systematic overestimation. What we  
213 intend to point out in the above mentioned is the fact that the dominant cause for

214 the difference in ice volume estimates between the Grid and DEM-only approach is  
215 due to different ice thickness values, as opposed to the additional contribution of  
216 different surface area. We have changed the sentence to clarify.

217

218 **Changes to manuscript:**

- 219 • Page 8, Line 7-8: “The main contribution to the difference in ice volume  
220 comes from different mean ice thickness values as opposed to surface area”

221

222

223 **Referee comment**

224 - Page 8, Line 2: “we regard the ice volume estimate of the Grid method as  
225 most accurate”.

226

227 As mentioned for Page 7, Lines 28-35, this statement is somewhat trivial here.

228

229 In this instance, we are not referring anymore to a comparison with the coarse  
230 interpolation based on 'Kriging', but compare the DEM-based and the DEM+GPR-  
231 combined approach. The fact that GPR introduces additional constraints may indeed  
232 sound trivial to the reader. However, we felt it was necessary to be clear about  
233 which ice volume estimate is regarded as the final and most reliable estimate. We  
234 have slightly modified our wording in this regard.

235

236 **Changes to manuscript:**

- 237 • Page 8, Lines 13-14: “Integrating both the DEM and GPR as constraints, the  
238 Grid method provides the most reliable ice volume estimate”

239

240

241 **Referee comment**

242 - Page 8, Lines 12-13: “It is worth noting that the vertical cliffs show instances of  
243 tilted and converging layers in close proximity to bedrock”.



244

245 Instead of 'converging' layers, the pattern in question rather looks in my opinion,  
246 from visual inspection of Fig. 8, like a layer from which another layer is swelling as  
247 a result of a rheological discontinuity (e.g. localized shearing), as often occurs at the  
248 margin of glaciers. This has potential implications not only for the detection of deep  
249 reflectors as stated by the authors, but also for the integrity of the ice layering. This  
250 comment, which I believe needs to be discussed in the manuscript, highlights my  
251 former comment on Page 1, Line 7 regarding the authors' rationale and uncertainty  
252 analysis on the argued 'undisturbed internal stratigraphy'.

253

254 We thank the referee for pointing out this additional hypothesis and we have  
255 integrated this point into our discussion. However, we believe that this stratigraphic  
256 convergence is an ablation feature rather than due rheology, as localized shearing  
257 appears evident only near the snout of the steepest slope glaciers, and features such  
258 as that shown in Fig. 8 occur elsewhere on Kilimanjaro glaciers, particularly those  
259 on the south side.

260

261 **Changes to manuscript:**

- 262 • Page 8, Lines 25-28: "We believe that this stratigraphic convergence is an  
263 ablation feature rather than due rheology (e.g. localized shearing at the  
264 glacier margin), as localized shearing appears evident only near the snout of  
265 the steepest slope glaciers, and features such as that shown in Figure 8 occur  
266 elsewhere on Kilimanjaro glaciers, particularly on the south side."

267

268

269 **Referee comment**

270 - Page 8, Lines 14-15: "[...] where ice thickness decreases rapidly due to the crater  
271 rim".

272

273 I do not think that the presence of the crater rim is the only reason for this 'ice  
274 thickness decrease'. In the case where, say after a period of increased accumulation

275 rate, more ice would flow towards the ice rim, ice thickness could in fact increase as  
276 a result of the blocking effect by the rim. In the case discussed by the authors, it is  
277 probably the conjunction of the rim vicinity and stagnant flow that causes the ice to  
278 reduce locally in thickness.

279

280 We appreciate this input by the referee. We were not trying to say the crater rim is  
281 the original cause of the decrease in ice thickness, but were simply referring to the  
282 situation as of today mapped by our GPR profiles. We have modified the wording to  
283 clarify. That said we are not aware of any direct evidence nor published accounts of  
284 ice flow at NIF.

285

286 **Changes to manuscript:**

- 287 • Page 8, Lines 29-30: "... in the part of the profiles showing decreasing ice  
288 thickness and gradual slope in the bedrock, likely the crater rim."

289

290

291 **Referee comment**

292 - Page 8, Lines 20-23: "It is plausible that the according change in the electrical con-  
293 ductivity of the ice layer produces a strong reflector seen in the GPR data (Sold et al.,  
294 2015). Accordingly, this strongly suggests dust layers being a main physical cause  
295 of IRH at NIF. Thompson et al. (2002) and Gabrielli et al. (2014) report visible dust  
296 layers in the NIF2 and NIF3 ice cores".

297

298 If the change in electrical conductivity expected from the ammonium and chloride  
299 documented by Thompson et al. (2002) results indeed from dust layers, a  
300 consequent change in ice crystal texture should also be expected, given the  
301 retardation effects of micro-particles on grain boundary migration and  
302 recrystallization. IRH might thus represent "iso-chemical" AND "iso-crystalline"  
303 reflectors.

304

305 This is an interesting suggestion and we agree that the known interaction between  
306 impurities and ice texture evolution can be expected also at NIF. IRH caused by ice  
307 texture are linked to the anisotropic dielectric properties of ice. Hence, a change in  
308 ice texture (i.e. grain size) is not sufficient for an IRH to occur, but would also need  
309 to go along with a systematic local anisotropy in crystal orientation. In turn, this  
310 would also imply a dependency on the electric polarisation of the GPR pulse. We  
311 have not observed a change in reflectors at points where we have almost  
312 perpendicular intersections of GPR profiles (e.g. point "intersection" in Fig. 4).  
313 Although we cannot entirely rule out the possibility for a contribution of crystal  
314 orientation to individual IRH, we feel that the change in ice chemistry at the large  
315 dust bands is certainly strong enough to explain all major IRHs discussed here.

316

317 **Changes to manuscript:**

318 No change necessary.

319

320

321 **Referee comment**

322 - Page 8, Line 33-Page 9, Line 8: discussion on IRH 1-5 tracking.

323

324 This discussion could be somewhat improved and made much clearer with the use,  
325 for instance, of a table giving (1) the expected depth of these horizons from previous  
326 ice cores, and (2) their depth detected by GPR. The total lengths between the drilling  
327 sites, the ice cliff, and the locations where the IRH tracks are lost would also be  
328 helpful in order to appraise the layer continuity/extension.

329

330 The ratio of vertical distances separating the IRH discussed at various locations  
331 would also help evaluating the vertical stratigraphical dilatation/shrinking along  
332 the studied profiles.

333

334 Except for IRH 5, which appears to clearly correspond to the exceptionally large  
335 dust layer found in the NIF3 ice core, the derivation of expected IRH depths based

336 on the impurity profiles of the ice cores remains ambiguous (except of the expected  
337 depth of the known dust horizons which we have already included in the text).  
338 However, we have followed the referee's suggestion and added to Table 3 a column  
339 for horizontal distances (in correspondence to Figure 4). We also now include the  
340 relative depth for each IRH in Table 3 to aid evaluating the vertical stratigraphical  
341 dilatation/shrinking.

342

343 **Changes to manuscript:**

- 344 • Modified Table 3 to include horizontal distances and relative depths of IRH.

345

346

347 **Referee comment**

348 - Page 9: Lines 9-19: discussion on continuous layering.

349 It is not clear, from this paragraph, where the authors want to lead the reader. It is  
350 only after reading the Conclusion section that one is able to get the authors' point  
351 regarding the importance of stratigraphical continuity between the former drill sites  
352 and the ice cliff: they are concerned about the possibility to efficiently and  
353 confidently relate the results from former ice cores to the results of the ice dating  
354 work along the ice cliff. This concern is totally justified here, and should be wrapped  
355 up more tightly in this section.

356

357 We thank the reviewer for pointing this out and have added text to reiterate here in  
358 modified form what is said in the Conclusions.

359

360 **Changes to manuscript:**

- 361 • rewrote paragraph on Page 9, starting Line 19.

362

363

364 **Referee comment**

365 - Page 9, Lines 15-19: “Although qualitatively going in the same direction as the  
366 adjustment of the NIF2 and NIF3 stable isotope records (i.e. in comparison with  
367 Figure 2 in Thompson et al. (2002)), tracing IRH between NIF2 and NIF3 suggests  
368 tie points that are systematically at greater depth in NIF3 as compared to the ice  
369 core stable isotope matching.”

370

371 Do the authors have an idea about why the ice stratigraphy is stretched at NIF3?  
372 Differences in accumulation cannot really be invoked here given the small distance  
373 between both NIF2 and NIF3 sites. Ice flow would probably play a role, which is  
374 difficult to determine without ice flow modelling though.

375

376 We do not have a conclusive explanation for this situation, and at this time can only  
377 note that the difference in relative depths seems to be predominant at lower depths  
378 (which becomes more evident by the revised version of Table 3 now). It also seems  
379 worth noting in this context that, as a general case at NIF, the visible dust bands on  
380 the vertical walls appear to vary in their relative depth. We agree with the referee  
381 that systematic differences in accumulation appear unlikely and, as stated  
382 previously, question whether ice flow could be involved in altering the stratigraphy  
383 of this thin, nearly-horizontal section of the glacier.

384

385 **Changes to manuscript:**

- 386 • Changes in Table 3.
- 387 • Additional clarification in paragraph on page 9, starting line 26.

388

389

390 **Referee comment**

391 - Page 9, Lines 26-29: “Hence our GPR profiles demonstrate a highly heterogeneous  
392 presence of meltwater near the surface, apparently a wide-spread feature at NIF re-  
393 lated to spatial and temporal variability in surface characteristics and processes  
394 (Hardy,2011). This finding is of relevance for any new ice core drilling efforts at NIF

395 in the future, and an important consideration for energy and mass balance  
396 modelling efforts.”

397

398 Although this section is called “Effects of near-surface meltwater”, these effects are  
399 not really discussed. The authors are only referring to this issue as “of relevance  
400 for”. I suggest that they either discuss this important issue more thoroughly, or  
401 suppress this section. This comment also applies to Lines 11-12 in the Conclusion  
402 section.

403

404 We agree that this is an important finding, although not in the original focus of our  
405 work. Hence we followed the referee's suggestion and have elaborated more on the  
406 relevance to future ice core drillings as well as modelling efforts.

407

408 **Changes to manuscript:**

- 409 • Page 10, Lines 13-16: “...suggesting that chemical and isotopic records of the  
410 upper 10~m or more could be potentially corrupted by meltwater. The wide-  
411 spread presence of near-surface meltwater also needs to be considered in  
412 future energy and mass balance modelling efforts. Further quantifying the  
413 generation and evolution of the near-surface meltwater distribution points to  
414 important future research questions at NIF.

415

416

417

418

419

420

421

422

423

424

425

426

427

428

429
